# Supplementary material for: Dihydrogen Bonding—Seen through the Eyes of Vibrational Spectroscopy
Source: MDPI journal article supplement (doi:10.3390/molecules28010263), 2022-12-28
Supplement: s1 [file s1]

# Supporting Materials: Dihydrogen Bonding - Seen Through the Eyes of Vibrational Spectroscopy

Marek Freindorf, Margaret McCutcheon, Nassim Beiranvand, and Elfi Kraka\*

Computational and Theoretical Chemistry Group (CATCO)  
Department of Chemistry, Southern Methodist University  
3215 Daniel Ave, Dallas, Texas 75275-0314, USA

Friday 16<sup>th</sup> December, 2022

## Contents

|          |                                                              |          |
|----------|--------------------------------------------------------------|----------|
| <b>1</b> | <b>NBO hydrogen charges for reference compounds</b>          | <b>2</b> |
| <b>2</b> | <b>Dihydrogen bonded complexes investigated in our study</b> | <b>3</b> |

---

\*email: ekraka@smu.edu

# 1 NBO hydrogen charges for reference compounds

Table S1: NBO hydrogen charges <sup>a</sup> for reference compounds.

|          | Molecule | q(H <sup>δ+</sup> ) | q(H <sup>δ-</sup> ) | Molecule | q(H <sup>δ+</sup> ) | q(H <sup>δ-</sup> ) |
|----------|----------|---------------------|---------------------|----------|---------------------|---------------------|
| Monomers | LiH      |                     | -0.795              | HOCl     | 0.580               |                     |
|          | BeH      |                     | -0.434              | KrH      |                     | -0.221              |
|          | BH4      |                     | -0.073              | ArF      | 0.258               |                     |
|          | CH4      | 0.206               |                     | KrF      | 0.104               |                     |
|          | NH3      | 0.352               |                     | C2H2     | 0.230               |                     |
|          | NH4      | 0.460               |                     | C2HF     | 0.240               |                     |
|          | H2O      | 0.460               |                     | HCN      | 0.225               |                     |
|          | H3O      | 0.580               |                     | HNC      | 0.438               |                     |
|          | HF       | 0.549               |                     | CHF      | 0.157               |                     |
|          | NaH      |                     | -0.800              | CHF2     | 0.124               |                     |
|          | AlH3     |                     | -0.392              | CHO      | 0.154               |                     |
|          | AlH4     |                     | -0.410              | CFO      | 0.492               |                     |
|          | GaH3     |                     | -0.301              | HNO      | 0.238               |                     |
|          | SiH4     |                     | -0.158              | H2NO     | 0.420               |                     |
|          | HCl      | 0.263               |                     | BeBe     |                     | -0.458              |
|          | HOCl2    | 0.583               |                     | FeH      | 0.145               |                     |

<sup>a</sup> q(H<sup>δ+</sup>): protonic atom charge (e), q(H<sup>δ-</sup>): hydridic atom charge (e).

## 2 Dihydrogen bonded complexes investigated in our study

$\omega$ B97X-D/aug-cc-pVTZ level of theory, bond length values  $R$  in Å, force constant  $k^a$  in mdyn/Å, vibrational frequency  $\omega_a$  in  $\text{cm}^{-1}$ , energy  $E$  in kcal/mol, electron density at critical points  $\rho_c$  in  $\text{e}/\text{\AA}^3$ , energy density at critical points  $H_c$  in Hartree/ $\text{\AA}^3$ .

Table S2: Dihydrogen Bonded Complexes,  $\omega$ B97X-D/aug-cc-pVTZ level of theory<sup>a</sup>.

| Molecule | Bond | $R$   | $k^a$ | $\Delta k^a$ | $\Delta k^a/k^a$ | $\omega_a$ | $\Delta\omega_a$ | $\Delta\omega_a/\omega_a$ | $E$    | $\rho_c$ | $H_c$  | $H_c/\rho_c$ | $n$   |
|----------|------|-------|-------|--------------|------------------|------------|------------------|---------------------------|--------|----------|--------|--------------|-------|
| LiC1     | Li-H | 1.614 | 0.978 | 0.001        | 0.001            | 1373       | 2                | 0.001                     | -0.73  | 0.261    | -0.003 | -0.012       | 0.191 |
|          | H-H  | 2.495 | 0.025 |              |                  | 290        |                  |                           |        | 0.037    | 0.003  | 0.088        |       |
| LiC2     | H-C  | 1.089 | 5.319 | -0.037       | -0.007           | 3116       | -11              | -0.004                    |        | 1.925    | -2.154 | -1.119       | 0.208 |
|          | Li-H | 1.641 | 0.817 | -0.160       | -0.163           | 1255       | -116             | -0.085                    |        | 0.246    | -0.001 | -0.005       |       |
|          | H-H  | 2.502 | 0.034 |              |                  | 336        |                  |                           | -14.03 | 0.062    | 0.001  | 0.021        |       |
|          | H-C  | 1.089 | 5.298 | 0.029        | 0.006            | 3110       | 9                | 0.003                     |        | 2.024    | -2.293 | -1.133       |       |
| LiC3     | Li-H | 1.640 | 0.822 | -0.155       | -0.158           | 1258       | -113             | -0.082                    |        | 0.248    | -0.002 | -0.007       | 0.230 |
|          | H-H  | 2.316 | 0.049 |              |                  | 408        |                  |                           | -12.42 | 0.079    | 0.001  | 0.011        |       |
| LiC4     | H-C  | 1.091 | 5.199 | -0.058       | -0.011           | 3081       | -17              | -0.005                    |        | 2.087    | -2.396 | -1.148       | 0.301 |
|          | Li-H | 1.609 | 0.978 | 0.001        | 0.001            | 1373       | 2                | 0.001                     |        | 0.259    | 0.000  | -0.001       |       |
| LiC5     | H-H  | 1.780 | 0.130 |              |                  | 661        |                  |                           | -8.83  | 0.137    | -0.005 | -0.036       | 0.261 |
|          | H-C  | 1.088 | 4.897 | -1.389       | -0.221           | 2990       | -398             | -0.117                    |        | 1.910    | -2.212 | -1.158       |       |
|          | Li-H | 1.610 | 0.989 | 0.012        | 0.013            | 1380       | 9                | 0.007                     |        | 0.261    | -0.002 | -0.007       |       |
|          | H-H  | 2.003 | 0.077 |              |                  | 509        |                  |                           | -4.14  | 0.087    | 0.002  | 0.028        |       |
| LiC6     | H-C  | 1.075 | 5.697 | -0.721       | -0.112           | 3225       | -198             | -0.058                    |        | 1.975    | 2.295  | 1.162        | 0.260 |
|          | Li-H | 1.610 | 0.988 | 0.011        | 0.012            | 1379       | 8                | 0.006                     |        | 0.261    | -0.002 | -0.006       |       |
| LiN1     | H-H  | 1.984 | 0.076 |              |                  | 506        |                  |                           | -4.38  | 0.090    | 0.002  | 0.025        | 0.306 |
|          | H-C  | 1.074 | 5.680 | -0.814       | -0.125           | 3220       | -223             | -0.065                    |        | 1.958    | -2.270 | -1.160       |       |
|          | Li-H | 1.671 | 0.729 | -0.248       | -0.253           | 1185       | -186             | -0.136                    |        | 0.232    | 0.001  | 0.005        |       |
|          | H-H  | 1.679 | 0.138 |              |                  | 681        |                  |                           | -18.07 | 0.221    | -0.026 | -0.119       |       |
| LiN2     | H-N  | 1.076 | 3.755 | -0.985       | -0.208           | 2604       | -321             | -0.110                    |        | 2.109    | -2.981 | -1.413       | 0.337 |
|          | Li-H | 1.612 | 0.916 | -0.061       | -0.062           | 1328       | -43              | -0.031                    |        | 0.258    | 0.001  | 0.004        |       |
| LiO      | H-H  | 1.520 | 0.194 |              |                  | 809        |                  |                           | -13.85 | 0.248    | -0.052 | -0.212       | 0.250 |
|          | H-N  | 1.042 | 3.414 | -4.602       | -0.574           | 2483       | -1321            | -0.347                    |        | 2.017    | -3.574 | -1.772       |       |
|          | Li-H | 1.704 | 0.629 | -0.348       | -0.356           | 1100       | -271             | -0.198                    |        | 0.219    | 0.002  | 0.008        |       |
|          | H-H  | 1.643 | 0.066 |              |                  | 472        |                  |                           | -20.20 | 0.241    | -0.036 | -0.148       |       |
| NaC1     | H-O  | 1.002 | 3.146 | -5.409       | -0.632           | 2373       | -1540            | -0.394                    |        | 2.177    | -4.416 | -2.028       | 0.193 |
|          | Na-H | 1.908 | 0.710 | -0.001       | -0.002           | 1117       | -1               | -0.001                    |        | 0.217    | 0.008  | 0.036        |       |
| NaC2     | H-H  | 2.485 | 0.026 |              |                  | 296        |                  |                           | -0.80  | 0.039    | 0.003  | 0.079        | 0.053 |
|          | H-C  | 1.089 | 5.305 | -0.051       | -0.010           | 3112       | -15              | -0.005                    |        | 1.925    | -2.152 | -1.118       |       |
|          | Na-H | 1.944 | 0.661 | -0.050       | -0.071           | 1078       | -40              | -0.036                    |        | 0.202    | 0.011  | 0.053        |       |
|          |      |       |       |              |                  |            |                  |                           |        |          |        |              |       |

Table S2 – Continued

| Molecule | Bond | $R$   | $k^a$ | $\Delta k^a$ | $\Delta k^a/k^a$ | $\omega_a$ | $\Delta\omega_a$ | $\Delta\omega_a/\omega_a$ | $E$    | $\rho_c$ | $H_c$  | $H_c/\rho_c$ | $n$   |
|----------|------|-------|-------|--------------|------------------|------------|------------------|---------------------------|--------|----------|--------|--------------|-------|
| NaC3     | H-H  | 2.427 | 0.036 |              |                  | 348        |                  |                           | -10.08 | 0.063    | 0.001  | 0.022        | 0.211 |
|          | H-C  | 1.091 | 5.180 | -0.089       | -0.017           | 3075       | -26              | -0.008                    |        | 2.014    | -2.272 | -1.128       |       |
|          | Na-H | 1.944 | 0.663 | -0.048       | -0.068           | 1079       | -39              | -0.035                    |        | 0.203    | 0.011  | 0.052        |       |
|          | H-H  | 2.231 | 0.057 |              |                  | 438        |                  |                           | -9.40  | 0.084    | 0.001  | 0.008        | 0.240 |
| NaC4     | H-C  | 1.093 | 5.103 | -0.154       | -0.029           | 3052       | -46              | -0.015                    |        | 2.077    | -2.377 | -1.144       |       |
|          | Na-H | 1.907 | 0.710 | -0.001       | -0.002           | 1117       | -1               | -0.001                    |        | 0.214    | 0.010  | 0.046        |       |
|          | H-H  | 1.767 | 0.132 |              |                  | 667        |                  |                           | -9.72  | 0.145    | -0.007 | -0.050       | 0.303 |
|          | H-C  | 1.092 | 4.643 | -1.643       | -0.261           | 2911       | -477             | -0.141                    |        | 1.892    | -2.185 | -1.155       |       |
| NaC5     | Na-H | 1.905 | 0.734 | 0.023        | 0.032            | 1136       | 18               | 0.016                     |        | 0.217    | 0.008  | 0.038        |       |
|          | H-H  | 2.001 | 0.079 |              |                  | 517        |                  |                           | -4.47  | 0.090    | 0.001  | 0.015        | 0.262 |
|          | H-C  | 1.076 | 5.588 | -0.830       | -0.129           | 3194       | -229             | -0.067                    |        | 1.969    | -2.284 | -1.160       |       |
|          | Na-H | 1.905 | 0.732 | 0.021        | 0.029            | 1134       | 16               | 0.014                     |        | 0.217    | 0.008  | 0.039        |       |
| NaC6     | H-H  | 1.980 | 0.077 |              |                  | 509        |                  |                           | -4.75  | 0.093    | 0.001  | 0.011        | 0.261 |
|          | H-C  | 1.075 | 5.545 | -0.949       | -0.146           | 3182       | -261             | -0.076                    |        | 1.950    | -2.258 | -1.158       |       |
|          | Na-H | 1.975 | 0.583 | -0.128       | -0.181           | 1013       | -105             | -0.094                    |        | 0.191    | 0.012  | 0.062        |       |
|          | H-H  | 1.599 | 0.138 |              |                  | 681        |                  |                           | -15.89 | 0.251    | -0.040 | -0.159       | 0.306 |
| NaN      | H-N  | 1.085 | 3.211 | -1.529       | -0.323           | 2407       | -518             | -0.177                    |        | 2.056    | -2.831 | -1.377       |       |
|          | Na-H | 2.022 | 0.408 | -0.303       | -0.427           | 847        | -271             | -0.242                    |        | 0.177    | 0.012  | 0.067        |       |
|          | H-H  | 1.572 | 0.113 |              |                  | 617        |                  |                           | -17.47 | 0.258    | -0.050 | -0.193       | 0.290 |
|          | H-O  | 1.005 | 3.573 | -4.982       | -0.582           | 2529       | -1384            | -0.354                    |        | 2.151    | -4.338 | -2.017       |       |
| BeC1     | Be-H | 1.336 | 2.332 | -0.027       | -0.011           | 2090       | -12              | -0.006                    |        | 0.653    | -0.325 | -0.498       |       |
|          | H-H  | 2.047 | 0.044 |              |                  | 387        |                  |                           | -1.98  | 0.065    | 0.005  | 0.082        | 0.223 |
|          | H-C  | 1.070 | 6.031 | -0.255       | -0.041           | 3318       | -70              | -0.021                    |        | 1.990    | -2.326 | -1.168       |       |
|          | Be-H | 1.335 | 2.359 | 0.000        | 0.000            | 2102       | 0                | 0.000                     |        | 0.661    | -0.334 | -0.506       |       |
| BeC2     | H-H  | 2.210 | 0.034 |              |                  | 336        |                  |                           | -1.03  | 0.046    | 0.005  | 0.118        | 0.208 |
|          | H-C  | 1.065 | 6.288 | -0.130       | -0.020           | 3388       | -35              | -0.010                    |        | 2.011    | -2.353 | -1.170       |       |
|          | Be-H | 1.335 | 2.357 | -0.002       | -0.001           | 2101       | -1               | 0.000                     |        | 0.661    | -0.334 | -0.506       |       |
|          | H-H  | 2.198 | 0.031 |              |                  | 322        |                  |                           | -1.06  | 0.047    | 0.005  | 0.117        | 0.202 |
| BeC3     | H-C  | 1.063 | 6.341 | -0.153       | -0.024           | 3402       | -41              | -0.012                    |        | 1.998    | -2.335 | -1.169       |       |
|          | Be-H | 1.360 | 2.071 | -0.288       | -0.122           | 1969       | -133             | -0.063                    |        | 0.586    | -0.260 | -0.445       |       |
|          | H-H  | 1.549 | 0.223 |              |                  | 867        |                  |                           | -10.66 | 0.205    | -0.030 | -0.148       | 0.350 |
|          | H-N  | 1.045 | 5.150 | -1.626       | -0.240           | 3049       | -449             | -0.128                    |        | 2.133    | -3.502 | -1.641       |       |

Table S2 – Continued

| Molecule | Bond | $R$   | $k^a$ | $\Delta k^a$ | $\Delta k^a/k^a$ | $\omega_a$ | $\Delta\omega_a$ | $\Delta\omega_a/\omega_a$ | $E$    | $\rho_c$ | $H_c$  | $H_c/\rho_c$ | $n$   |
|----------|------|-------|-------|--------------|------------------|------------|------------------|---------------------------|--------|----------|--------|--------------|-------|
| BeN2     | Be-H | 1.388 | 1.743 | -0.616       | -0.261           | 1807       | -295             | -0.140                    |        | 0.504    | -0.190 | -0.376       |       |
|          | H-H  | 1.147 | 0.374 |              |                  | 1123       |                  |                           | -26.76 | 0.563    | -0.318 | -0.565       | 0.404 |
|          | H-N  | 1.165 | 1.194 | -4.698       | -0.797           | 1468       | -1793            | -0.550                    |        | 1.579    | -2.164 | -1.370       |       |
| BeN3     | Be-H | 1.371 | 1.958 | -0.401       | -0.170           | 1915       | -187             | -0.089                    |        | 0.554    | -0.232 | -0.418       |       |
|          | H-H  | 1.349 | 0.305 |              |                  | 1014       |                  |                           | -16.22 | 0.339    | -0.113 | -0.333       | 0.382 |
|          | H-N  | 1.096 | 3.020 | -2.809       | -0.482           | 2335       | -909             | -0.280                    |        | 1.898    | -2.949 | -1.554       |       |
| BeN4     | Be-H | 1.336 | 2.306 | -0.053       | -0.022           | 2078       | -24              | -0.011                    |        | 0.647    | -0.318 | -0.492       |       |
|          | H-H  | 1.801 | 0.082 |              |                  | 525        |                  |                           | -1.98  | 0.105    | 0.000  | -0.001       | 0.265 |
|          | H-N  | 1.004 | 7.252 | -0.764       | -0.095           | 3618       | -186             | -0.049                    |        | 2.272    | -4.109 | -1.809       |       |
| BeO1     | Be-H | 1.375 | 1.883 | -0.476       | -0.202           | 1878       | -224             | -0.107                    |        | 0.536    | -0.214 | -0.399       |       |
|          | H-H  | 1.237 | 0.406 |              |                  | 1169       |                  |                           | -21.18 | 0.431    | -0.198 | -0.459       | 0.414 |
|          | H-O  | 1.048 | 2.797 | -4.740       | -0.629           | 2238       | -1435            | -0.391                    |        | 1.839    | -3.655 | -1.987       |       |
| BeO2     | Be-H | 1.382 | 1.761 | -0.598       | -0.253           | 1816       | -286             | -0.136                    |        | 0.520    | -0.200 | -0.385       |       |
|          | H-H  | 1.170 | 0.409 |              |                  | 1173       |                  |                           | -24.45 | 0.522    | -0.281 | -0.539       | 0.414 |
|          | H-O  | 1.076 | 1.775 | -5.551       | -0.758           | 1783       | -1839            | -0.508                    |        | 1.721    | -3.202 | -1.860       |       |
| BeO3     | Be-H | 1.394 | 1.536 | -0.823       | -0.349           | 1696       | -406             | -0.193                    |        | 0.497    | -0.181 | -0.365       |       |
|          | H-H  | 1.091 | 0.351 |              |                  | 1087       |                  |                           | -29.61 | 0.653    | -0.419 | -0.641       | 0.397 |
|          | H-O  | 1.119 | 0.756 | -6.418       | -0.895           | 1163       | -2421            | -0.676                    |        | 1.538    | -2.457 | -1.597       |       |
| BeO4     | Be-H | 1.405 | 1.574 | -0.669       | -0.298           | 1716       | -334             | -0.163                    |        | 0.482    | -0.168 | -0.348       |       |
|          | H-H  | 1.144 | 0.411 |              |                  | 1177       |                  |                           | -30.69 | 0.562    | -0.323 | -0.575       | 0.415 |
|          | H-O  | 1.089 | 1.448 | -6.089       | -0.808           | 1610       | -2063            | -0.562                    |        | 1.635    | -2.914 | -1.782       |       |
| BeF      | Be-H | 1.342 | 2.188 | -0.171       | -0.072           | 2024       | -78              | -0.037                    |        | 0.640    | -0.310 | -0.485       |       |
|          | H-H  | 1.642 | 0.117 |              |                  | 627        |                  |                           | -4.08  | 0.163    | -0.015 | -0.091       | 0.293 |
|          | H-F  | 0.929 | 8.376 | -1.343       | -0.138           | 3854       | -297             | -0.072                    |        | 2.448    | -5.762 | -2.354       |       |
| BeCl     | Be-H | 1.339 | 2.288 | -0.071       | -0.030           | 2070       | -32              | -0.015                    |        | 0.649    | -0.322 | -0.495       |       |
|          | H-H  | 1.834 | 0.067 |              |                  | 474        |                  |                           | -2.44  | 0.112    | 0.001  | 0.007        | 0.251 |
|          | H-Cl | 1.290 | 4.653 | -0.484       | -0.094           | 2839       | -144             | -0.048                    |        | 1.660    | -1.663 | -1.002       |       |
| BC1      | B-H  | 1.233 | 2.881 |              |                  | 2301       |                  |                           |        | 1.027    | -1.018 | -0.991       |       |
|          | H-H  | 2.192 | 0.107 |              |                  | 601        |                  |                           |        | 0.073    | 0.007  | 0.094        | 0.286 |
|          | H-C  | 1.089 | 5.301 |              |                  | 3111       |                  |                           |        | 1.936    | -2.173 | -1.122       |       |
| BC2      | B-H  | 1.240 | 2.755 |              |                  | 2250       |                  |                           |        | 1.009    | -0.991 | -0.982       |       |
|          | H-H  | 2.362 | 0.071 |              |                  | 489        |                  |                           |        | 0.060    | 0.007  | 0.124        | 0.255 |

Table S2 – Continued

| Molecule | Bond | $R$   | $k^a$ | $\Delta k^a$ | $\Delta k^a/k^a$ | $\omega_a$ | $\Delta\omega_a$ | $\Delta\omega_a/\omega_a$ | $E$    | $\rho_c$ | $H_c$  | $H_c/\rho_c$ | $n$   |
|----------|------|-------|-------|--------------|------------------|------------|------------------|---------------------------|--------|----------|--------|--------------|-------|
| BC3      | H-C  | 1.090 | 5.267 |              |                  | 3101       |                  |                           |        | 1.932    | -2.170 | -1.123       |       |
|          | B-H  | 1.237 | 2.773 | -0.015       | -0.005           | 2258       | -6               | -0.003                    |        | 1.007    | -0.986 | -0.979       |       |
|          | H-H  | 2.093 | 0.015 |              |                  | 224        |                  |                           | -19.83 | -        | -      | -            | 0.165 |
| BC4      | H-C  | 1.092 | 5.026 | -1.260       | -0.200           | 3029       | -359             | -0.106                    |        | 1.896    | -2.231 | -1.177       |       |
|          | B-H  | 1.238 | 2.803 | 0.015        | 0.005            | 2270       | 6                | 0.003                     |        | 1.004    | -0.985 | -0.981       |       |
|          | H-H  | 2.533 | 0.016 |              |                  | 231        |                  |                           | -2.88  | -        | -      | -            | 0.168 |
| BN1      | H-C  | 1.090 | 5.304 | -0.052       | -0.010           | 3112       | -15              | -0.005                    |        | 1.934    | -2.154 | -1.114       |       |
|          | B-H  | 1.241 | 2.717 |              |                  | 2235       |                  |                           |        | 0.998    | -0.974 | -0.976       |       |
|          | H-H  | 1.995 | 0.119 |              |                  | 633        |                  |                           |        | 0.098    | 0.006  | 0.062        | 0.294 |
| BN2      | H-N  | 1.015 | 6.729 |              |                  | 3485       |                  |                           |        | 2.329    | -3.465 | -1.488       |       |
|          | B-H  | 1.257 | 2.423 |              |                  | 2110       |                  |                           |        | 0.927    | -0.865 | -0.932       |       |
|          | H-H  | 1.416 | 0.268 |              |                  | 949        |                  |                           |        | 0.332    | -0.086 | -0.260       | 0.369 |
| BN3      | H-N  | 1.069 | 3.225 |              |                  | 2413       |                  |                           |        | 2.003    | -3.116 | -1.556       |       |
|          | B-H  | 1.244 | 2.669 |              |                  | 2215       |                  |                           |        | 0.992    | -0.966 | -0.973       |       |
|          | H-H  | 2.020 | 0.106 |              |                  | 598        |                  |                           |        | 0.097    | 0.006  | 0.062        | 0.285 |
| BN4      | H-N  | 1.016 | 6.715 |              |                  | 3482       |                  |                           |        | 2.327    | -3.428 | -1.473       |       |
|          | B-H  | 1.265 | 2.211 |              |                  | 2016       |                  |                           |        | 0.908    | -0.836 | -0.921       |       |
|          | H-H  | 1.392 | 0.199 |              |                  | 819        |                  |                           |        | 0.374    | -0.112 | -0.299       | 0.339 |
| BN5      | H-N  | 1.083 | 2.398 |              |                  | 2081       |                  |                           |        | 1.925    | -2.928 | -1.521       |       |
|          | B-H  | 1.240 | 2.766 | -0.022       | -0.008           | 2255       | -9               | -0.004                    |        | 0.995    | -0.969 | -0.974       |       |
|          | H-H  | 2.051 | 0.044 |              |                  | 386        |                  |                           | -8.42  | 0.089    | 0.004  | 0.047        | 0.223 |
| BO1      | H-N  | 1.022 | 6.444 | -0.548       | -0.078           | 3411       | -142             | -0.040                    |        | 2.276    | -3.405 | -1.496       |       |
|          | B-H  | 1.248 | 2.596 |              |                  | 2184       |                  |                           |        | 0.972    | -0.936 | -0.962       |       |
|          | H-H  | 1.774 | 0.142 |              |                  | 691        |                  |                           |        | 0.148    | -0.003 | -0.023       | 0.309 |
| BO2      | H-O  | 0.971 | 7.186 |              |                  | 3587       |                  |                           |        | 2.442    | -5.010 | -2.052       |       |
|          | B-H  | 1.249 | 2.577 |              |                  | 2177       |                  |                           |        | 0.973    | -0.936 | -0.963       |       |
|          | H-H  | 1.796 | 0.125 |              |                  | 648        |                  |                           |        | 0.146    | -0.003 | -0.022       | 0.298 |
| BS1      | H-O  | 0.968 | 7.437 |              |                  | 3649       |                  |                           |        | 2.460    | -5.042 | -2.049       |       |
|          | B-H  | 1.236 | 2.823 |              |                  | 2278       |                  |                           |        | 1.014    | -0.997 | -0.984       |       |
|          | H-H  | 1.929 | 0.111 |              |                  | 610        |                  |                           |        | 0.113    | 0.004  | 0.037        | 0.288 |
| BS2      | H-S  | 1.347 | 4.008 |              |                  | 2639       |                  |                           |        | 1.484    | -1.452 | -0.978       |       |
|          | B-H  | 1.242 | 2.704 |              |                  | 2229       |                  |                           |        | 0.997    | -0.973 | -0.976       |       |

Table S2 – Continued

| Molecule | Bond | $R$   | $k^a$ | $\Delta k^a$ | $\Delta k^a/k^a$ | $\omega_a$ | $\Delta\omega_a$ | $\Delta\omega_a/\omega_a$ | $E$    | $\rho_c$ | $H_c$  | $H_c/\rho_c$ | $n$   |
|----------|------|-------|-------|--------------|------------------|------------|------------------|---------------------------|--------|----------|--------|--------------|-------|
| BF       | H-H  | 1.985 | 0.073 |              |                  | 497        |                  |                           |        | 0.105    | 0.004  | 0.040        | 0.257 |
|          | H-S  | 1.347 | 3.924 |              |                  | 2611       |                  |                           |        | 1.481    | -1.449 | -0.978       |       |
|          | B-H  | 1.243 | 2.598 | -0.190       | -0.068           | 2186       | -78              | -0.034                    |        | 0.966    | -0.920 | -0.953       |       |
|          | H-H  | 1.534 | 0.064 |              |                  | 466        |                  |                           | -20.77 | 0.240    | -0.046 | -0.192       | 0.248 |
| SiN      | H-F  | 0.958 | 5.867 | -3.852       | -0.396           | 3226       | -925             | -0.223                    |        | 2.182    | 5.052  | -2.316       |       |
|          | Si-H | 1.511 | 2.554 | -0.296       | -0.104           | 2111       | -119             | -0.053                    |        | 0.718    | -0.415 | -0.578       |       |
|          | H-H  | 1.600 | 0.175 |              |                  | 769        |                  |                           | -7.45  | 0.175    | -0.020 | -0.112       | 0.327 |
|          | H-N  | 1.038 | 5.516 | -1.260       | -0.186           | 3156       | -342             | -0.098                    |        | 2.175    | -3.576 | -1.644       |       |
| SiO      | Si-H | 1.537 | 2.200 | -0.650       | -0.228           | 1959       | -271             | -0.122                    |        | 0.662    | -0.363 | -0.549       |       |
|          | H-H  | 1.288 | 0.320 |              |                  | 1038       |                  |                           | -17.36 | 0.391    | -0.161 | -0.413       | 0.387 |
|          | H-O  | 1.039 | 3.003 | -4.534       | -0.602           | 2319       | -1354            | -0.369                    |        | 1.894    | -3.822 | -2.018       |       |
|          | Si-H | 1.492 | 2.729 | -0.121       | -0.042           | 2182       | -48              | -0.022                    |        | 0.783    | -0.480 | -0.614       |       |
| SiF      | H-H  | 1.828 | 0.056 |              |                  | 435        |                  |                           | -1.51  | 0.099    | 0.000  | 0.004        | 0.238 |
|          | H-F  | 0.923 | 9.133 | -0.586       | -0.060           | 4025       | -126             | -0.030                    |        | 2.510    | -5.909 | -2.354       |       |
|          | Al-H | 1.656 | 1.466 | -0.019       | -0.013           | 1600       | -11              | -0.007                    |        | 0.443    | -0.109 | -0.246       |       |
|          | H-H  | 1.674 | 0.141 |              |                  | 688        |                  |                           | -11.95 | 0.170    | -0.017 | -0.098       | 0.308 |
| AlO2     | H-O  | 0.974 | 6.961 | -1.588       | -0.186           | 3530       | -382             | -0.098                    |        | 2.410    | -4.964 | -2.060       |       |
|          | Al-H | 1.667 | 1.360 | -0.125       | -0.084           | 1541       | -70              | -0.043                    |        | 0.415    | -0.092 | -0.221       |       |
|          | H-H  | 1.352 | 0.289 |              |                  | 987        |                  |                           | -23.34 | 0.347    | -0.121 | -0.350       | 0.376 |
|          | H-O  | 1.018 | 3.738 | -4.612       | -0.552           | 2587       | -1279            | -0.331                    |        | 2.437    | -3.943 | -1.618       |       |
| AlF      | Al-H | 1.604 | 1.844 | -0.377       | -0.170           | 1795       | -175             | -0.089                    |        | 0.529    | -0.159 | -0.300       |       |
|          | H-H  | 2.278 | 0.031 |              |                  | 324        |                  |                           | -10.42 | -        | -      | -            | 0.202 |
|          | H-F  | 0.930 | 8.462 | -1.257       | -0.129           | 3874       | -277             | -0.067                    |        | 2.429    | -5.842 | -2.405       |       |
|          | Ga-H | 1.575 | 2.082 | -0.194       | -0.085           | 1886       | -86              | -0.044                    |        | 0.778    | -0.409 | -0.525       |       |
| GaF      | H-H  | 2.484 | 0.024 |              |                  | 282        |                  |                           | -6.25  | -        | -      | -            | 0.188 |
|          | H-F  | 0.925 | 9.139 | -0.580       | -0.060           | 4026       | -125             | -0.030                    |        | 2.486    | -5.918 | -2.380       |       |
|          | C-H  | 1.089 | 5.196 | -0.160       | -0.030           | 3080       | -47              | -0.015                    |        | 1.907    | -2.148 | -1.126       |       |
|          | H-H  | 2.213 | 0.013 |              |                  | 213        |                  |                           | -1.79  | -        | -      | -            | 0.159 |
| AB1      | H-F  | 0.922 | 9.394 | -0.325       | -0.033           | 4082       | -69              | -0.017                    |        | 2.521    | -5.956 | -2.363       |       |
|          | B-H  | 1.217 | 3.150 | -0.179       | -0.054           | 2406       | -68              | -0.027                    |        | 1.107    | -1.141 | -1.030       |       |
|          | H-H  | 2.003 | 0.029 |              |                  | 313        |                  |                           | -16.80 | -        | -      | -            | 0.199 |



Table S2 – Continued

| Molecule | Bond  | $R$   | $k^a$ | $\Delta k^a$ | $\Delta k^a/k^a$ | $\omega_a$ | $\Delta\omega_a$ | $\Delta\omega_a/\omega_a$ | $E$    | $\rho_c$ | $H_c$  | $H_c/\rho_c$ | $n$   |
|----------|-------|-------|-------|--------------|------------------|------------|------------------|---------------------------|--------|----------|--------|--------------|-------|
| AB2      | H-N   | 1.013 | 7.044 | 0.005        | 0.001            | 3566       | 1                | 0.000                     |        | 2.288    | -3.631 | -1.587       |       |
|          | B-H2  | 1.215 | 3.204 | -0.125       | -0.038           | 2427       | -47              | -0.019                    |        | 1.112    | -1.149 | -1.033       |       |
|          | B-H3  | 1.220 | 3.072 | -0.257       | -0.077           | 2376       | -98              | -0.040                    |        | 1.096    | -1.122 | -1.024       |       |
| AB3      | H1-H2 | 1.916 | 0.046 |              |                  | 394        |                  |                           | -32.77 | 0.118    | 0.002  | 0.018        | 0.226 |
|          | H1-H3 | 2.181 | 0.028 |              |                  | 309        |                  |                           |        | -        | -      | -            |       |
|          | H1-N  | 1.022 | 6.469 | -0.570       | -0.081           | 3417       | -148             | -0.042                    |        | 2.299    | -3.627 | -1.577       |       |
| AB4      | B-H2  | 1.220 | 3.064 | -0.265       | -0.080           | 2373       | -101             | -0.041                    |        | 1.092    | -1.117 | -1.022       |       |
|          | H1-H2 | 2.069 | 0.061 |              |                  | 452        |                  |                           | -48.05 | 0.097    | 0.005  | 0.056        | 0.244 |
|          | H1-N  | 1.020 | 6.635 | -0.404       | -0.057           | 3461       | -104             | -0.029                    |        | 2.313    | -3.628 | -1.568       |       |
| AB5      | B-H   | 1.216 | 3.219 | -0.110       | -0.033           | 2432       | -42              | -0.017                    |        | 1.116    | -1.156 | -1.036       |       |
|          | H-H   | 2.153 | 0.039 |              |                  | 363        |                  |                           | -8.64  | -        | -      | -            | 0.216 |
|          | H-N   | 1.051 | 5.200 | 0.460        | 0.097            | 3064       | 139              | 0.048                     |        | 2.261    | -3.161 | -1.398       |       |
| AB6      | B-H   | 1.219 | 3.146 | -0.183       | -0.055           | 2405       | -69              | -0.028                    |        | 1.101    | -1.133 | -1.028       |       |
|          | H-H   | 1.990 | 0.038 |              |                  | 356        |                  |                           | -9.51  | 0.096    | 0.005  | 0.051        | 0.214 |
|          | H-O   | 0.966 | 7.791 | -0.764       | -0.089           | 3735       | -178             | -0.045                    |        | 2.457    | -5.066 | -2.062       |       |
| AB7      | B-H   | 1.216 | 3.210 | -0.119       | -0.036           | 2429       | -45              | -0.018                    |        | 1.116    | -1.157 | -1.036       |       |
|          | H-H   | 2.488 | 0.014 |              |                  | 220        |                  |                           | -10.46 | -        | -      | -            | 0.162 |
|          | H-N   | 1.015 | 6.856 | -0.136       | -0.019           | 3518       | -35              | -0.010                    |        | 2.315    | -3.433 | -1.483       |       |
| AB8      | B-H   | 1.225 | 3.017 | -0.312       | -0.094           | 2355       | -119             | -0.048                    |        | 1.066    | -1.076 | -1.009       |       |
|          | H-H   | 1.582 | 0.114 |              |                  | 619        |                  |                           | -10.48 | 0.208    | -0.028 | -0.135       | 0.291 |
|          | H-F   | 0.941 | 7.091 | -2.628       | -0.270           | 3546       | -605             | -0.146                    |        | 2.339    | -5.487 | -2.345       |       |
| FeN1     | Fe-H  | 1.536 | 1.942 | -0.023       | -0.012           | 1825       | -11              | -0.006                    |        | 0.802    | -0.432 | -0.539       |       |
|          | H-H   | 1.967 | 0.08  |              |                  | 518        |                  |                           | -3.81  | 0.089    | 0.003  | 0.032        | 0.263 |
|          | H-N   | 1.015 | 6.761 | -0.231       | -0.033           | 3494       | -59              | -0.017                    |        | 2.310    | -3.406 | -1.474       |       |
| FeN2     | Fe-H  | 1.537 | 1.939 | -0.026       | -0.013           | 1823       | -13              | -0.007                    |        | 0.804    | -0.433 | -0.539       |       |
|          | H-H   | 2.198 | 0.033 |              |                  | 335        |                  |                           | -4.41  | 0.067    | 0.006  | 0.095        | 0.206 |
|          | H-N   | 1.015 | 6.789 | -0.203       | -0.029           | 3501       | -52              | -0.015                    |        | 2.310    | -3.430 | -1.485       |       |
| FeO1     | Fe-H  | 1.54  | 1.89  | -0.075       | -0.038           | 1800       | -36              | -0.020                    |        | 0.788    | -0.417 | -0.529       |       |
|          | H-H   | 1.701 | 0.131 |              |                  | 664        |                  |                           | -5.98  | 0.150    | -0.011 | -0.072       | 0.302 |
|          | H-O   | 0.968 | 7.475 | -1.080       | -0.126           | 3658       | -255             | -0.065                    |        | 2.436    | -5.014 | -2.058       |       |
| FeO2     | Fe-H  | 1.537 | 1.93  | -0.035       | -0.018           | 1819       | -17              | -0.009                    |        | 0.806    | -0.435 | -0.539       |       |

Table S2 – Continued

| Molecule        | Bond  | $R$   | $k^a$ | $\Delta k^a$ | $\Delta k^a/k^a$ | $\omega_a$ | $\Delta\omega_a$ | $\Delta\omega_a/\omega_a$ | $E$     | $\rho_c$ | $H_c$  | $H_c/\rho_c$ | $n$   |
|-----------------|-------|-------|-------|--------------|------------------|------------|------------------|---------------------------|---------|----------|--------|--------------|-------|
| FeF1            | H-H   | 2.037 | 0.02  |              |                  | 262        |                  |                           | -5.99   | 0.092    | 0.003  | 0.038        | 0.179 |
|                 | H-O   | 0.967 | 7.713 | -0.842       | -0.098           | 3716       | -197             | -0.050                    |         | 2.447    | -5.048 | -2.063       |       |
|                 | Fe-H  | 1.545 | 1.827 | -0.138       | -0.070           | 1770       | -66              | -0.036                    |         | 0.769    | -0.395 | -0.514       |       |
|                 | H-H   | 1.451 | 0.254 |              |                  | 924        |                  |                           | -10.96  | 0.263    | -0.065 | -0.248       | 0.363 |
| FeF2            | H-F   | 0.948 | 6.343 | -3.376       | -0.347           | 3354       | -798             | -0.192                    |         | 2.281    | -5.241 | -2.298       |       |
|                 | Fe-H  | 1.537 | 1.734 | -0.231       | -0.118           | 1724       | -112             | -0.061                    |         | 0.804    | -0.431 | -0.536       |       |
|                 | H-H   | 1.802 | 0.008 |              |                  | 161        |                  |                           | -11.14  | 0.152    | -0.011 | -0.074       | 0.139 |
|                 | H-F   | 0.942 | 7.16  | -2.559       | -0.263           | 3563       | -589             | -0.142                    |         | 2.327    | -5.448 | -2.341       |       |
| KrO             | Kr-H  | 1.769 | 0.845 | -0.188       | -0.182           | 1200       | -127             | -0.096                    |         | 0.696    | -0.307 | -0.441       |       |
|                 | H-H   | 1.866 | 0.063 |              |                  | 462        |                  |                           | -3.10   | 0.111    | -0.004 | -0.032       | 0.246 |
|                 | H-O   | 0.965 | 7.743 | -0.812       | -0.095           | 3723       | -190             | -0.049                    |         | 2.469    | -5.044 | -2.043       |       |
| BeAr            | Be-H  | 1.359 | 2.011 | -0.348       | -0.148           | 1940       | -162             | -0.077                    |         | 0.592    | -0.273 | -0.461       |       |
|                 | H-H   | 1.322 | 0.169 |              |                  | 755        |                  |                           | -8.12   | 0.368    | -0.135 | -0.368       | 0.324 |
|                 | H-Ar  | 1.373 | 1.807 | -1.346       | -0.427           | 1766       | -567             | -0.243                    |         | 1.341    | -1.239 | -0.924       |       |
| BeKr            | Be-H  | 1.346 | 2.195 | -0.164       | -0.070           | 2027       | -75              | -0.036                    |         | 0.632    | -0.308 | -0.487       |       |
|                 | H-H   | 1.674 | 0.082 |              |                  | 527        |                  |                           | -3.65   | 0.167    | -0.010 | -0.061       | 0.265 |
|                 | H-Kr  | 1.485 | 2.585 | -0.289       | -0.101           | 2099       | -114             | -0.052                    |         | 1.273    | -1.044 | -0.820       |       |
| Ar1             | C-H   | 1.083 | 5.564 |              |                  | 3187       |                  |                           |         | 1.975    | -2.249 | -1.139       |       |
|                 | H-H   | 2.472 | 0.271 |              |                  | 955        |                  |                           |         | -        | -      | -            | 0.370 |
| Ar2             | C-H   | 1.083 | 5.569 |              |                  | 3188       |                  |                           |         | 1.975    | -2.251 | -1.139       |       |
|                 | H-H   | 2.464 | 0.273 |              |                  | 959        |                  |                           |         | -        | -      | -            | 0.370 |
| Ar3             | C-H   | 1.080 | 5.651 |              |                  | 3212       |                  |                           |         | 1.989    | -2.278 | -1.145       |       |
|                 | H-H   | 1.998 | 0.296 |              |                  | 999        |                  |                           |         | 0.090    | 0.013  | 0.141        | 0.379 |
| H2              | H-H   | 0.743 | 5.835 | 0.000        | 0.000            | 4433       | 0                | 0.000                     | -107.34 | 1.820    | -2.047 | -1.125       | 1.000 |
| H2P             | H-H   | 1.105 | 1.263 | 0.000        | 0.000            | 2062       | 0                | 0.000                     | -68.57  | 0.596    | -0.499 | -0.837       | 0.500 |
| H3P             | H-H   | 0.878 | 2.737 |              |                  | 3036       |                  |                           | -107.42 | 1.611    | -1.537 | -0.954       | 0.710 |
| H4P             | H1-H3 | 1.259 | 0.177 |              |                  | 773        |                  |                           | -12.00  | 0.440    | -0.234 | -0.532       | 0.205 |
|                 | H1-H2 | 1.000 | 0.806 |              |                  | 1648       |                  |                           |         | 1.176    | -0.962 | -0.818       | 0.408 |
|                 | H2-H2 | 0.829 | 3.479 |              |                  | 3423       |                  |                           |         | 1.531    | -1.475 | -0.963       | 0.791 |
| H5P( $D_{2d}$ ) | H1-H2 | 1.134 | 0.219 |              |                  | 858        |                  |                           | -29.86  | 0.821    | -0.548 | -0.667       | 0.226 |

Table S2 – Continued

| Molecule | Bond  | $R$   | $k^a$ | $\Delta k^a$ | $\Delta k^a/k^a$ | $\omega_a$ | $\Delta\omega_a$ | $\Delta\omega_a/\omega_a$ | $E$    | $\rho_c$ | $H_c$  | $H_c/\rho_c$ | $n$   |
|----------|-------|-------|-------|--------------|------------------|------------|------------------|---------------------------|--------|----------|--------|--------------|-------|
| H6P      | H2-H2 | 0.787 | 3.683 |              |                  | 3522       |                  |                           |        | 1.655    | -1.721 | -1.040       | 0.812 |
|          | H1-H1 | 1.017 | 1.079 |              |                  | 1906       |                  |                           |        | 0.832    | -0.707 | -0.850       | 0.466 |
|          | H1-H3 | 1.252 | 0.297 |              |                  | 1000       |                  |                           | -21.34 | 0.624    | -0.288 | -0.461       | 0.260 |
|          | H3-H3 | 0.794 | 4.235 |              |                  | 3777       |                  |                           |        | 1.565    | -1.639 | -1.047       | 0.865 |
| H7P      | H1-H2 | 0.881 | 1.181 |              |                  | 1994       |                  |                           |        | 1.456    | -1.371 | -0.942       | 0.485 |
|          | H2-H2 | 0.983 | 1.119 |              |                  | 1941       |                  |                           |        | -        | -      | -            | 0.473 |
|          | H2-H3 | 1.556 | 0.101 |              |                  | 584        |                  |                           | -8.18  | 0.280    | -0.054 | -0.194       | 0.159 |
|          | H3-H3 | 0.758 | 5.130 |              |                  | 4157       |                  |                           |        | 1.750    | -1.917 | -1.095       | 0.943 |
| H9P      | H1-H1 | 0.905 | 1.558 |              |                  | 2291       |                  |                           |        | 1.509    | -1.374 | -0.910       | 0.550 |
|          | H1-H3 | 1.675 | 0.113 |              |                  | 616        |                  |                           | -5.98  | 0.211    | -0.022 | -0.103       | 0.168 |
|          | H3-H3 | 0.754 | 5.376 |              |                  | 4255       |                  |                           |        | 1.768    | -1.950 | -1.103       | 0.963 |
|          |       |       |       |              |                  |            |                  |                           |        |          |        |              |       |
| LiH      | Li-H  | 1.615 | 0.977 |              |                  | 1371       |                  |                           |        | 0.260    | -0.002 | -0.008       |       |
| BeH      | Be-H  | 1.335 | 2.359 |              |                  | 2102       |                  |                           |        | 0.665    | -0.339 | -0.509       |       |
| BH4      | B-H   | 1.239 | 2.788 |              |                  | 2264       |                  |                           |        | 1.003    | -0.984 | -0.981       |       |
| CH4      | C-H   | 1.088 | 5.356 |              |                  | 3127       |                  |                           |        | 1.915    | -2.165 | -1.131       |       |
| NH3      | N-H   | 1.011 | 6.992 |              |                  | 3553       |                  |                           |        | 2.336    | -3.365 | -1.441       |       |
| NH4      | N-H   | 1.022 | 6.776 |              |                  | 3498       |                  |                           |        | 2.292    | -3.749 | -1.636       |       |
| H2O      | O-H   | 0.957 | 8.555 |              |                  | 3913       |                  |                           |        | 2.536    | -5.153 | -2.032       |       |
| H3O      | O-H   | 0.975 | 7.537 |              |                  | 3673       |                  |                           |        | 2.325    | -5.013 | -2.156       |       |
| HF       | F-H   | 0.918 | 9.719 |              |                  | 4151       |                  |                           |        | 2.557    | -5.990 | -2.342       |       |
| NaH      | Na-H  | 1.908 | 0.711 |              |                  | 1118       |                  |                           |        | 0.216    | 0.010  | 0.044        |       |
| AlH3     | Al-H  | 1.583 | 2.221 |              |                  | 1970       |                  |                           |        | 0.558    | -0.177 | -0.316       |       |
| AlH4     | Al-H  | 1.646 | 1.485 |              |                  | 1611       |                  |                           |        | 0.461    | -0.120 | -0.260       |       |
| GaH3     | Ga-H  | 1.562 | 2.276 |              |                  | 1972       |                  |                           |        | 0.806    | -0.439 | -0.545       |       |
| SiH4     | Si-H  | 1.483 | 2.850 |              |                  | 2230       |                  |                           |        | 0.813    | -0.512 | -0.630       |       |
| HCl      | Cl-H  | 1.280 | 5.137 |              |                  | 2983       |                  |                           |        | 1.700    | -1.714 | -1.008       |       |
| HOCl2    | O-H   | 0.982 | 7.174 |              |                  | 3584       |                  |                           |        | 2.328    | -4.992 | -2.144       |       |
| HOCl     | O-H   | 0.979 | 7.326 |              |                  | 3622       |                  |                           |        | 2.326    | -4.991 | -2.146       |       |
| KrH      | Kr-H  | 1.720 | 1.033 |              |                  | 1327       |                  |                           |        | 0.775    | -0.391 | -0.504       |       |
| ArF      | Ar-H  | 1.332 | 3.153 |              |                  | 2333       |                  |                           |        | 1.513    | -1.423 | -0.940       |       |
| KrF      | Kr-H  | 1.477 | 2.874 |              |                  | 2213       |                  |                           |        | 1.296    | -1.069 | -0.824       |       |

Table S2 – Continued

| Molecule | Bond | $R$   | $k^a$ | $\Delta k^a$ | $\Delta k^a/k^a$ | $\omega_a$ | $\Delta\omega_a$ | $\Delta\omega_a/\omega_a$ | $E$ | $\rho_c$ | $H_c$  | $H_c/\rho_c$ | $n$ |
|----------|------|-------|-------|--------------|------------------|------------|------------------|---------------------------|-----|----------|--------|--------------|-----|
| C2H2     | C-H  | 1.062 | 6.418 |              |                  | 3423       |                  |                           |     | 2.020    | -2.375 | -1.176       |     |
| C2HF     | C-H  | 1.060 | 6.494 |              |                  | 3443       |                  |                           |     | 2.008    | -2.360 | -1.175       |     |
| HCN      | C-H  | 1.066 | 6.286 |              |                  | 3388       |                  |                           |     | -        | -      | -            |     |
| HNC      | N-H  | 0.995 | 8.016 |              |                  | 3804       |                  |                           |     | 2.335    | -4.165 | -1.784       |     |
| CHF      | C-H  | 1.090 | 5.269 |              |                  | 3101       |                  |                           |     | 1.994    | -2.258 | -1.132       |     |
| CHF2     | C-H  | 1.091 | 5.257 |              |                  | 3098       |                  |                           |     | 2.067    | -2.355 | -1.139       |     |
| CHO      | O-H  | 0.956 | 8.549 |              |                  | 3912       |                  |                           |     | 2.564    | -5.198 | -2.027       |     |
| CFO      | O-H  | 0.961 | 8.350 |              |                  | 3866       |                  |                           |     | 2.494    | -5.144 | -2.062       |     |
| HNO      | N-H  | 1.057 | 4.740 |              |                  | 2925       |                  |                           |     | 2.220    | -2.849 | -1.283       |     |
| H2NO     | N-H  | 1.042 | 5.829 |              |                  | 3244       |                  |                           |     | 2.226    | -3.686 | -1.656       |     |
| BeBe     | Be-H | 1.344 | 2.243 |              |                  | 2050       |                  |                           |     | 0.653    | -0.328 | -0.502       |     |
| FeH      | Fe-H | 1.535 | 1.965 |              |                  | 1836       |                  |                           |     | 0.810    | -0.442 | -0.545       |     |

<sup>a</sup>Bond length values  $R$  in Å, force constant  $k^a$  in mdyn/Å, vibrational frequency  $\omega_a$  in  $\text{cm}^{-1}$ , energy  $E$  in kcal/mol, electron density at critical points  $\rho_c$  in  $\text{e}/\text{\AA}^3$ , energy density at critical points  $H_c$  in Hartree/ $\text{\AA}^3$ .
